# Supplementary material for: A comparative analysis of cannabis and tobacco smoke exposure on human airway epithelial cell gene expression, immune phenotype, and response to formoterol and budesonide treatment
Source: bioRxiv or medRxiv preprint supplement (doi:10.1101/516294), 2019-01-09

Figure 1

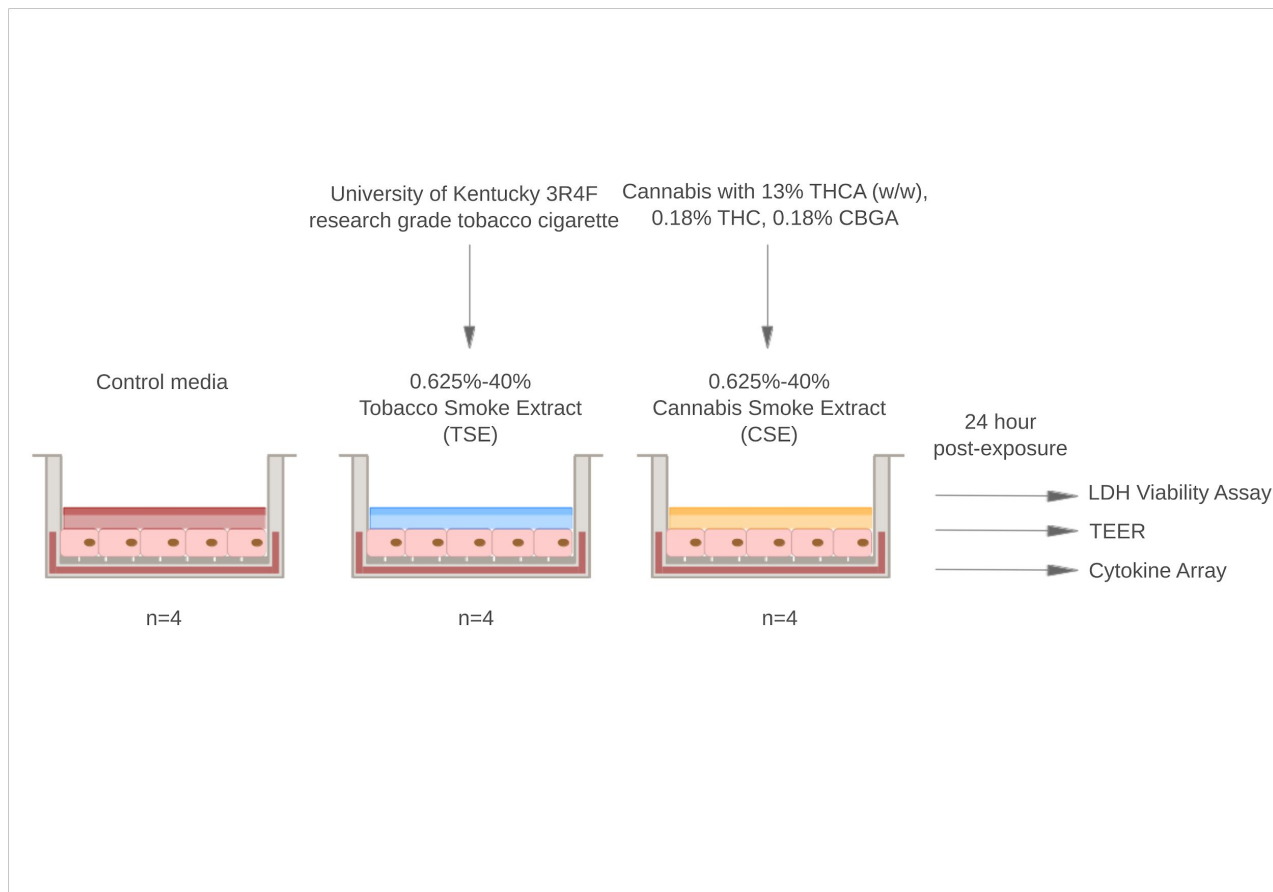

Figure 2

A

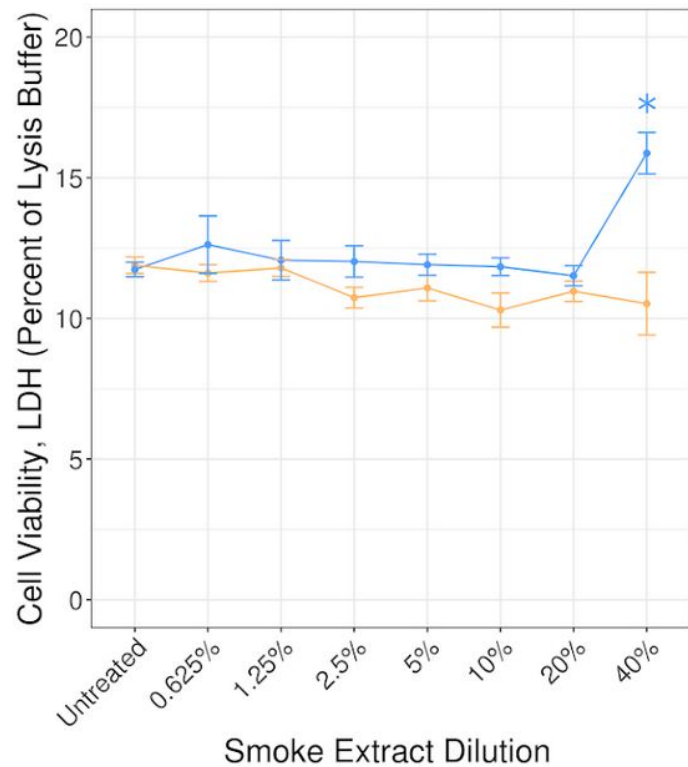

B

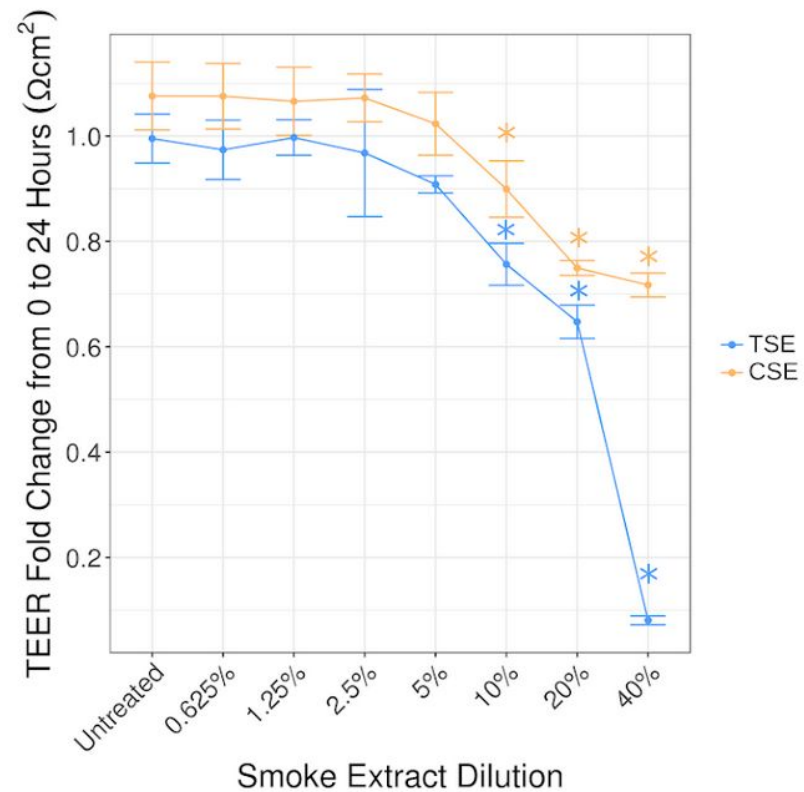

Figure 3

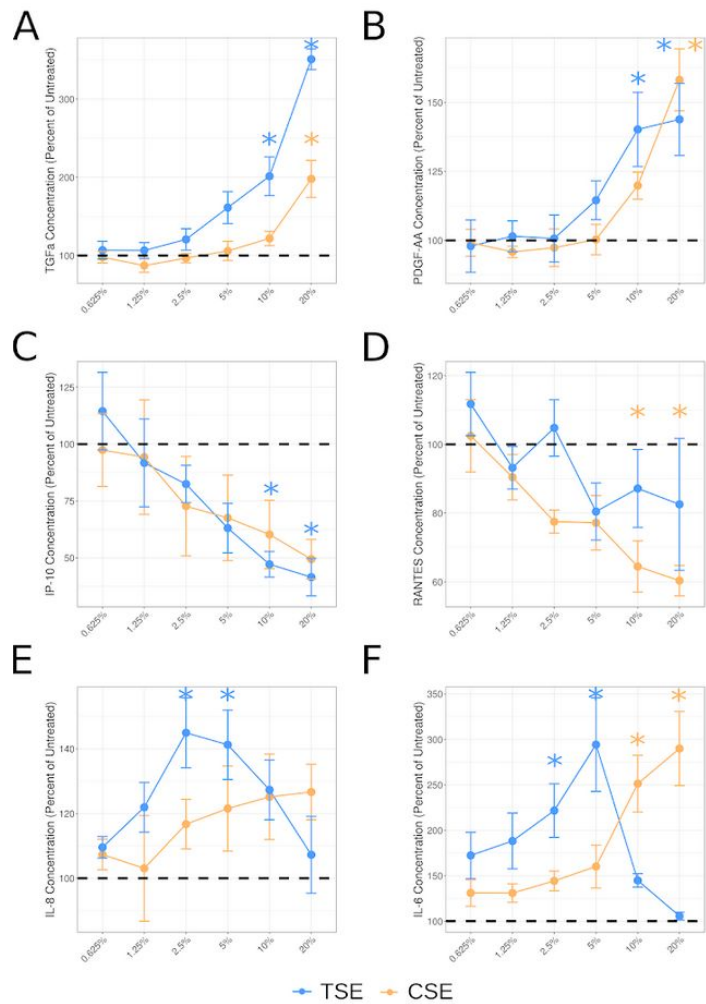

Figure 4

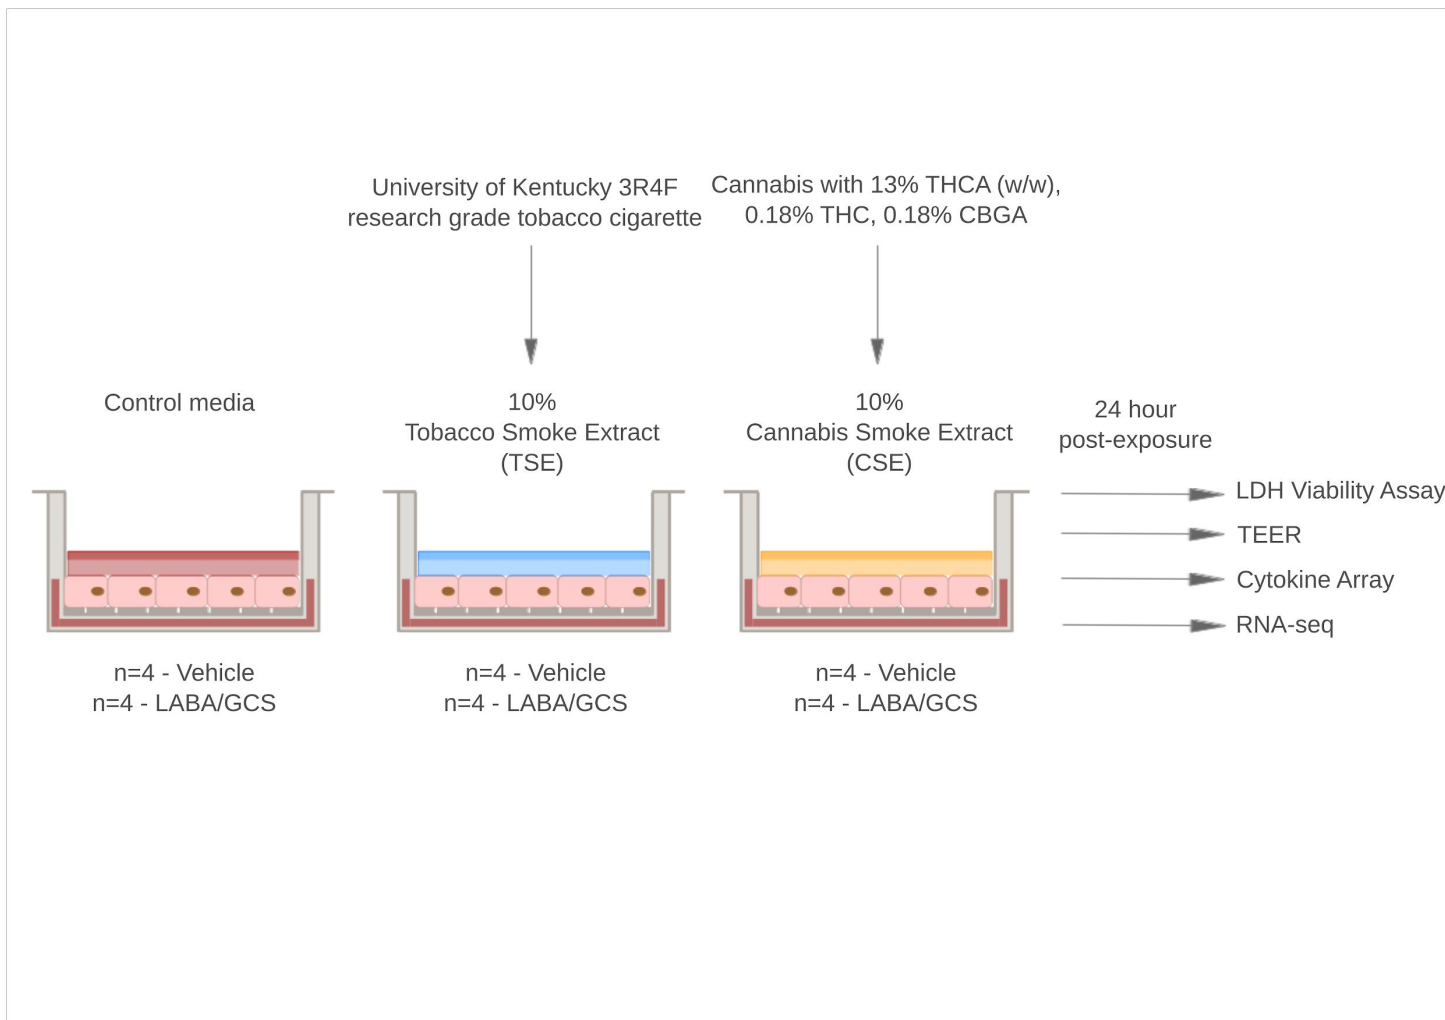

Figure 5

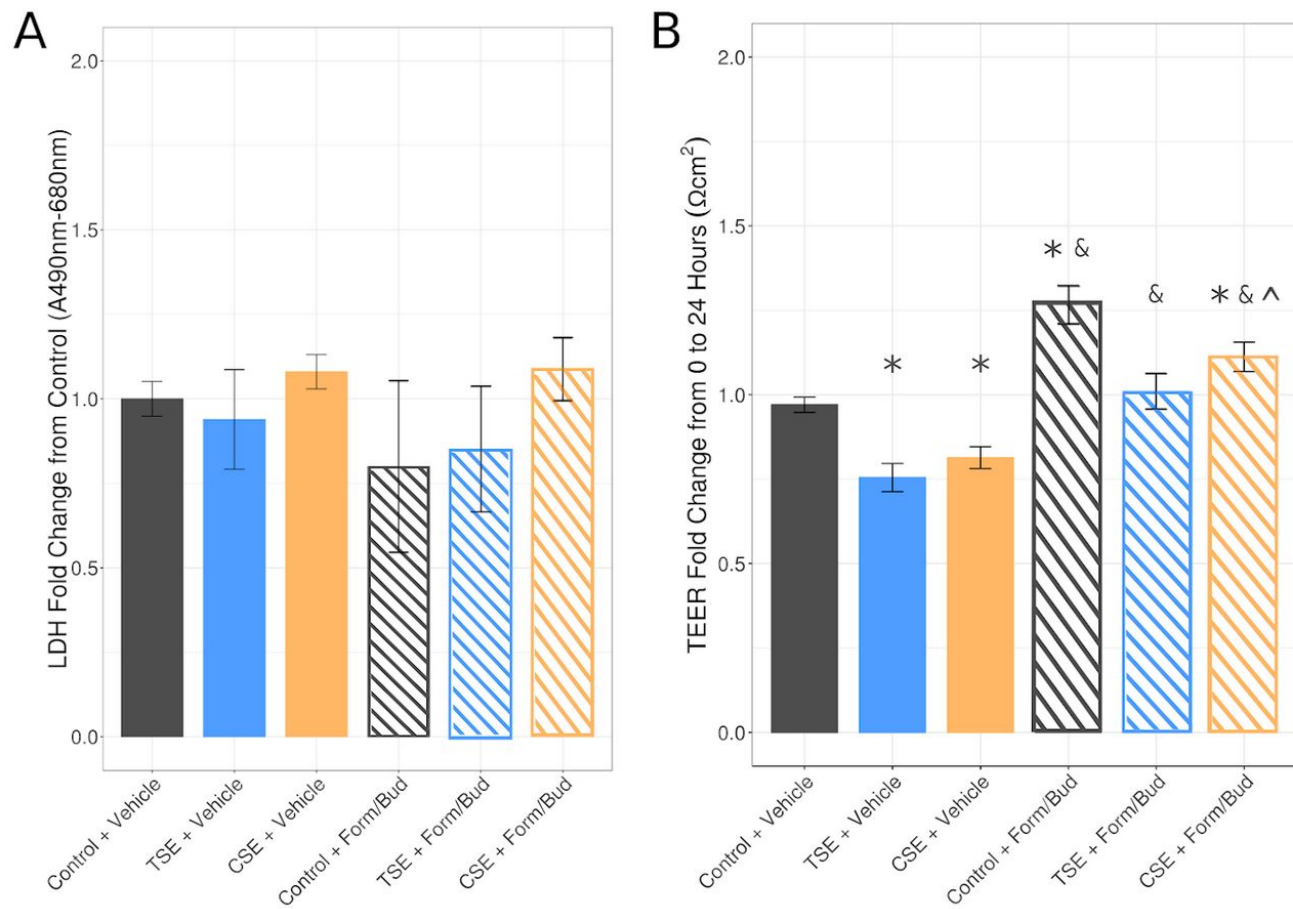

Figure 6

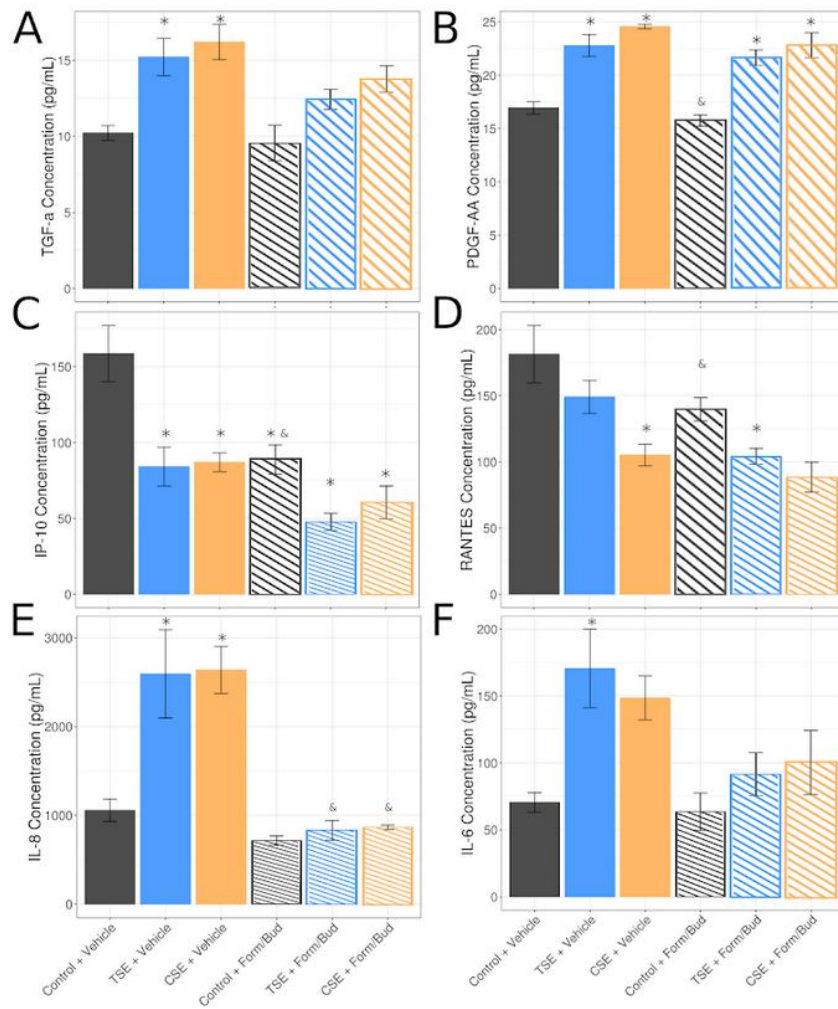

Figure 7

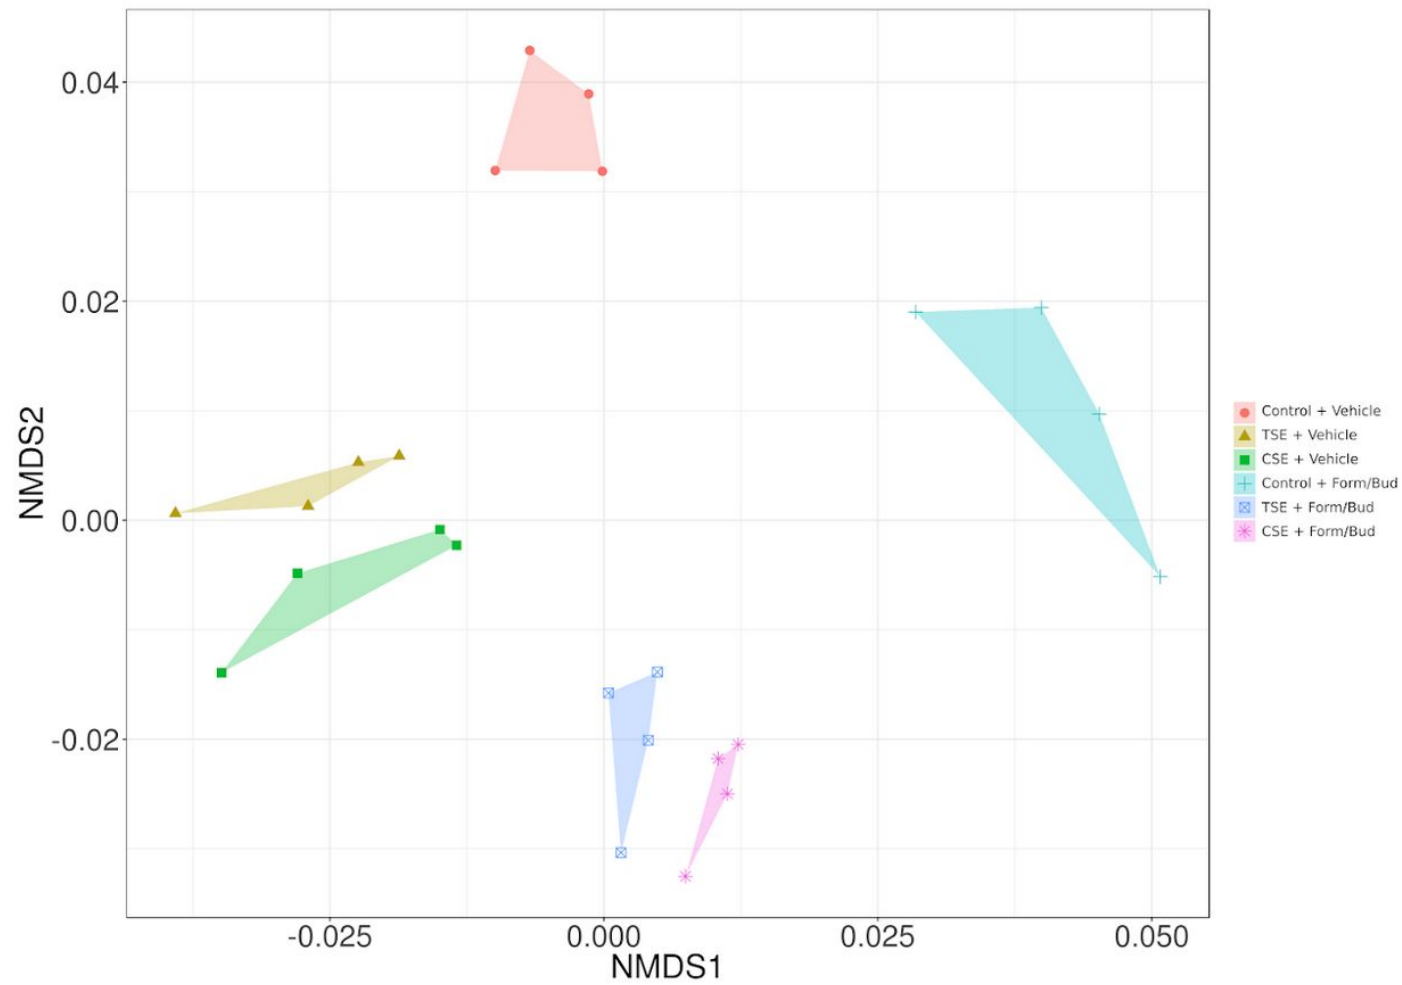

Figure 8

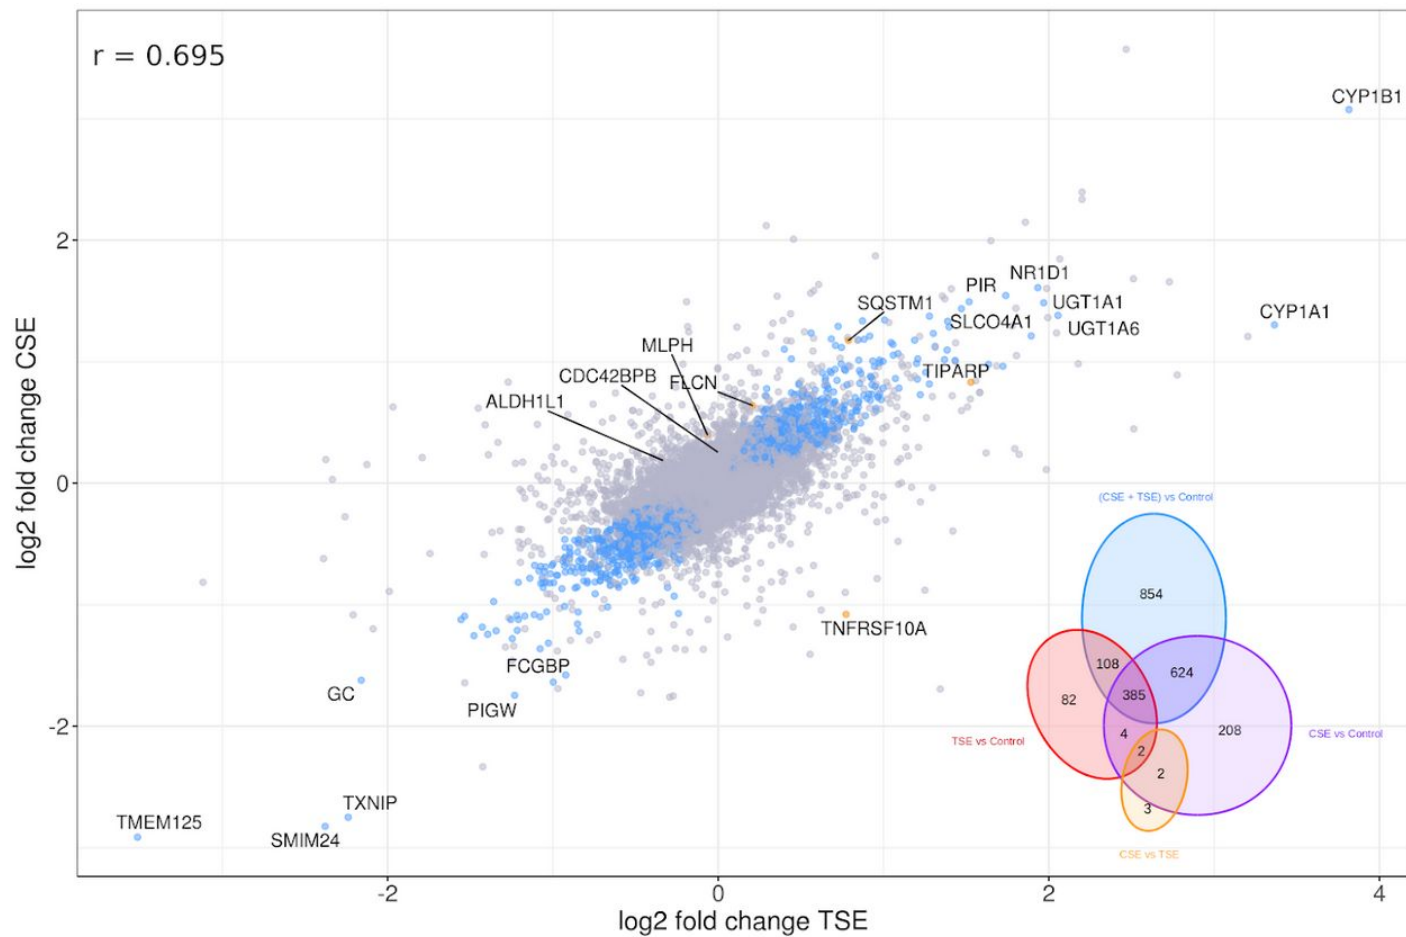



Figure X (Omitted in BioRxiv Preprint)

- Define network based on B[a]p signature genes
- Color nodes by log<sub>2</sub> fold change
- Point of figure can be that B[a]p induced genes form an interconnected network and that the network responds almost identically between both smoke exposures, implicating B[a]p as the main driver of the response

A

Cannabis

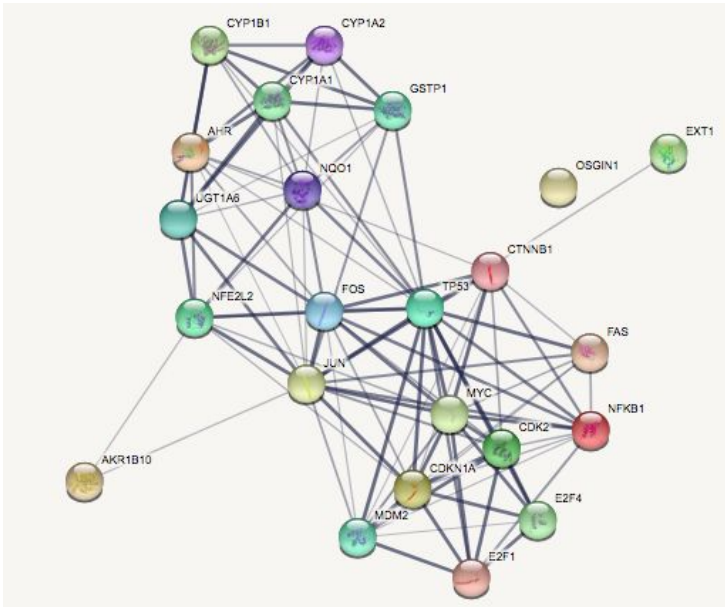

B

Tobacco

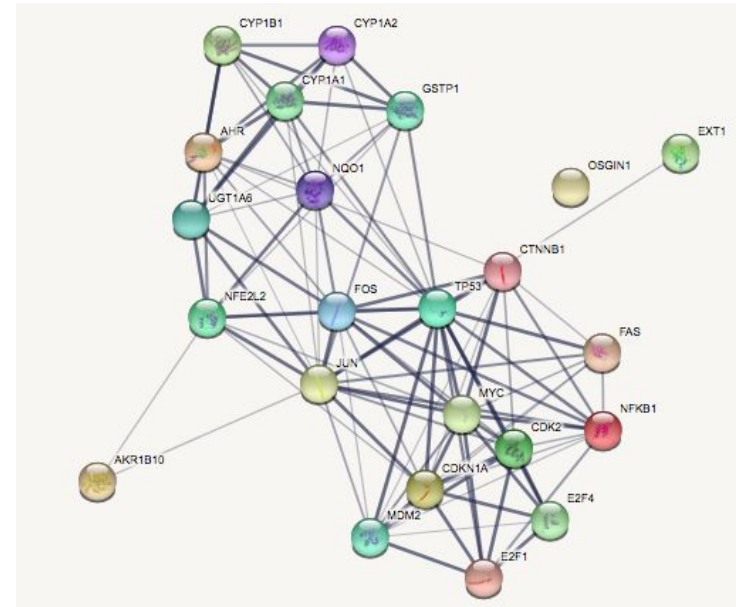

Figure 9

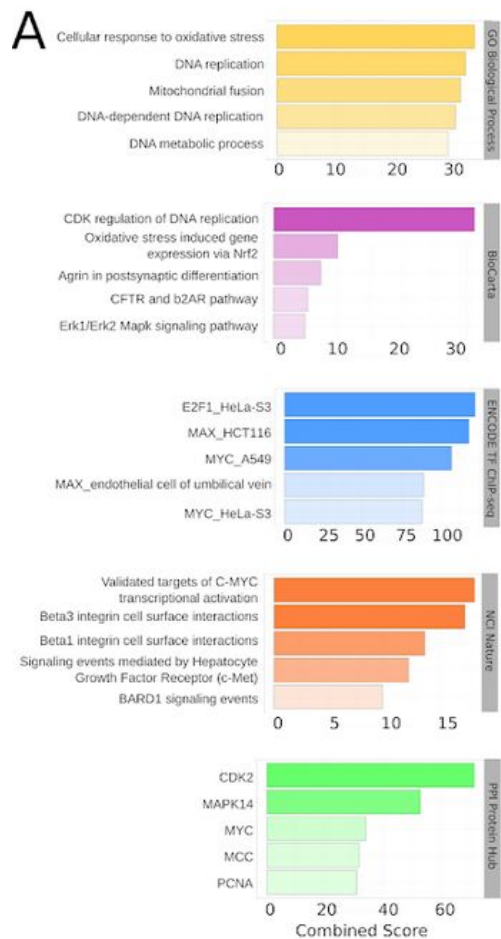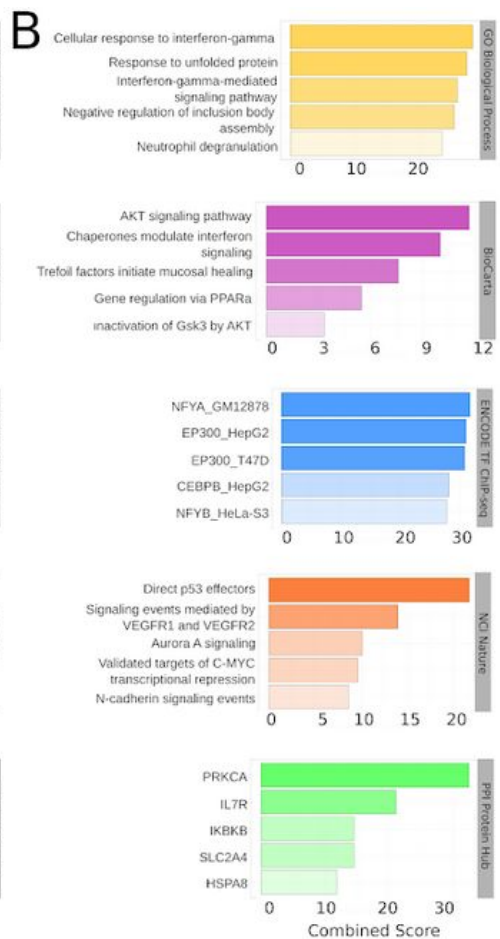

Figure 10

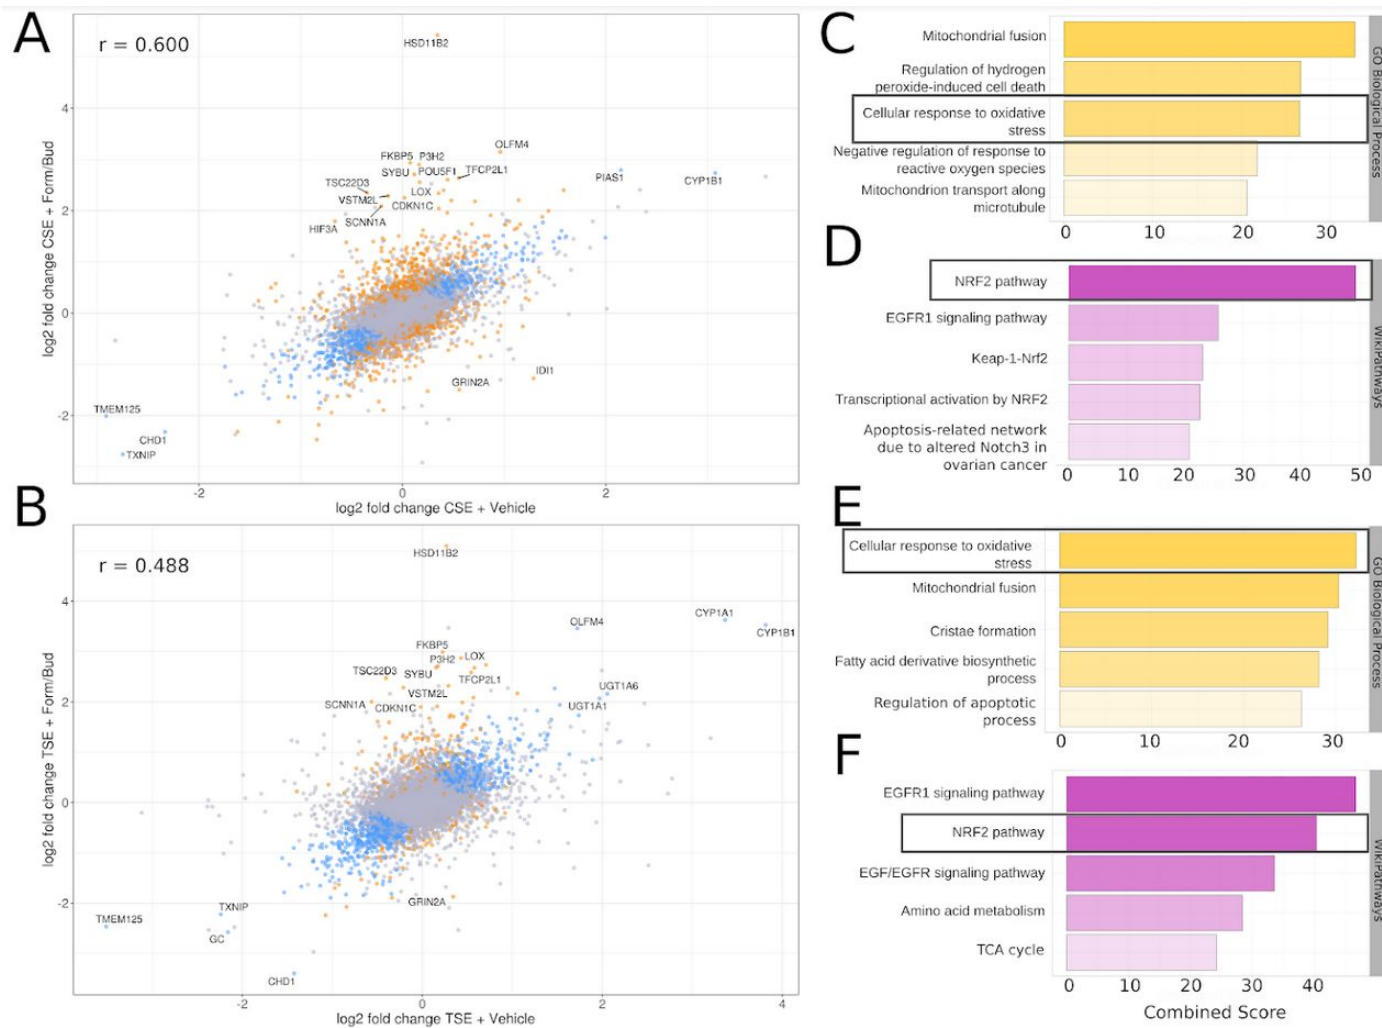

Figure 11

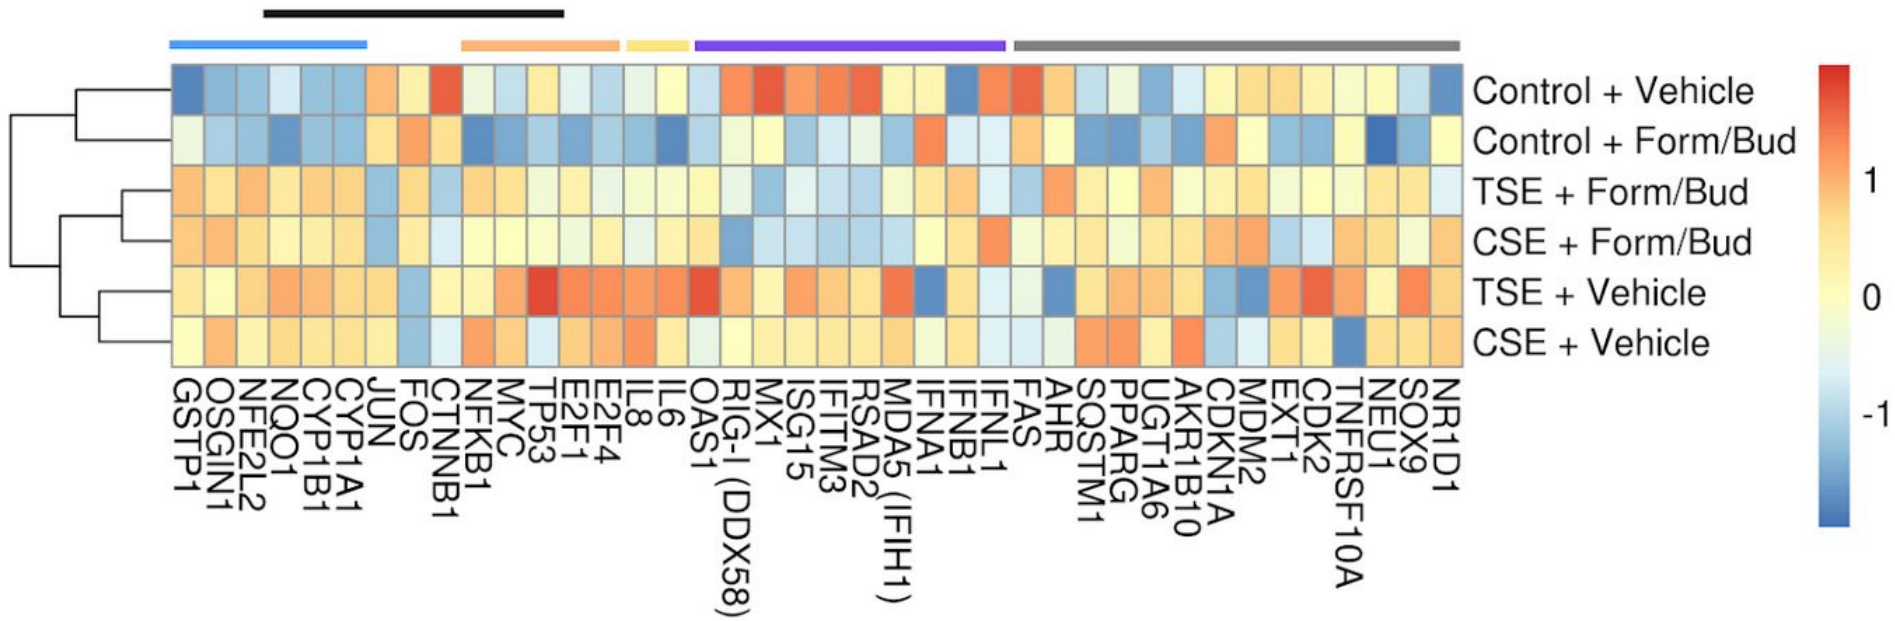

Figure 12

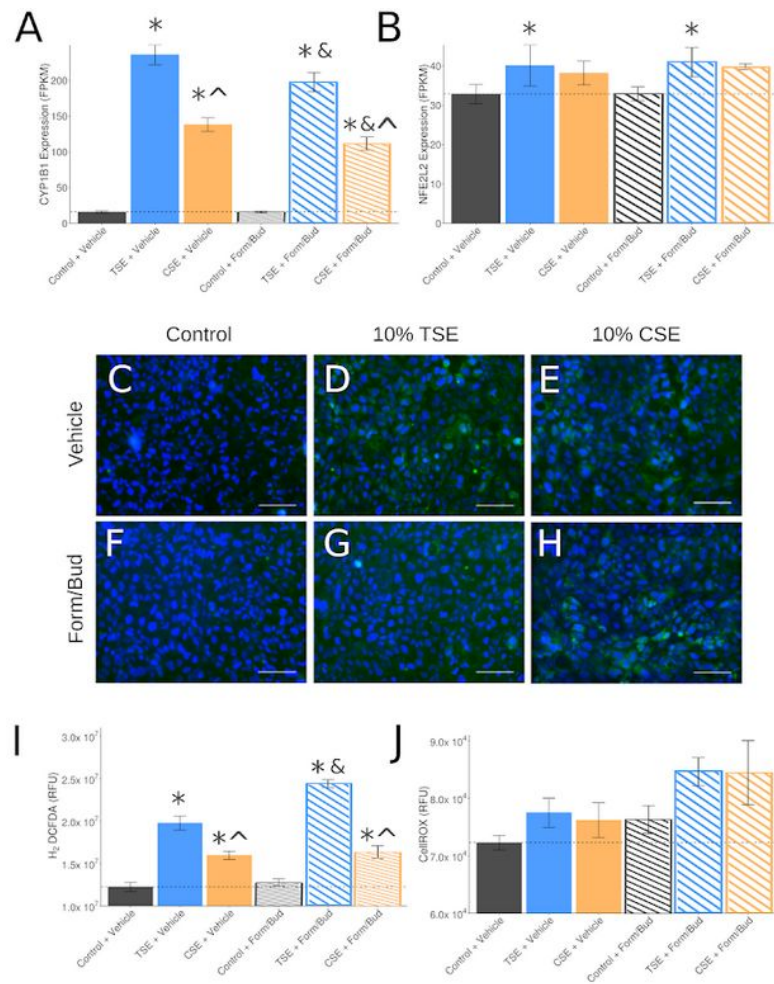

Figure X (Omitted from BioRxiv Preprint)

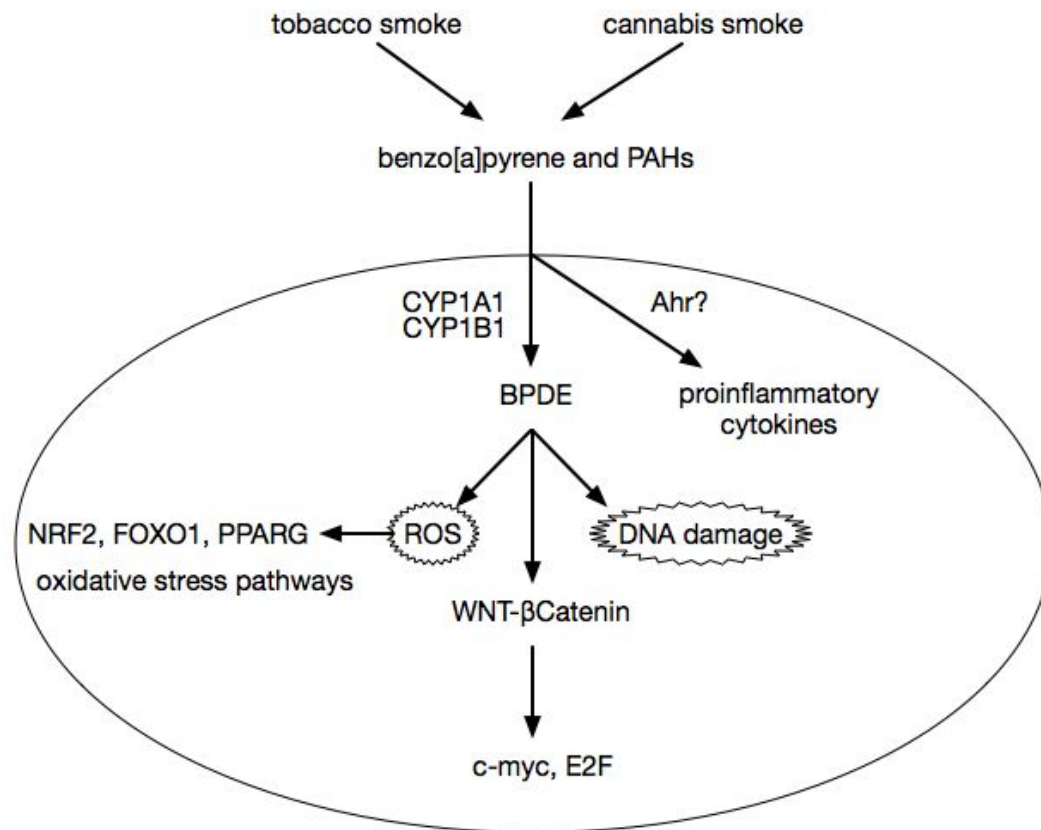

# Supplement Figure 1

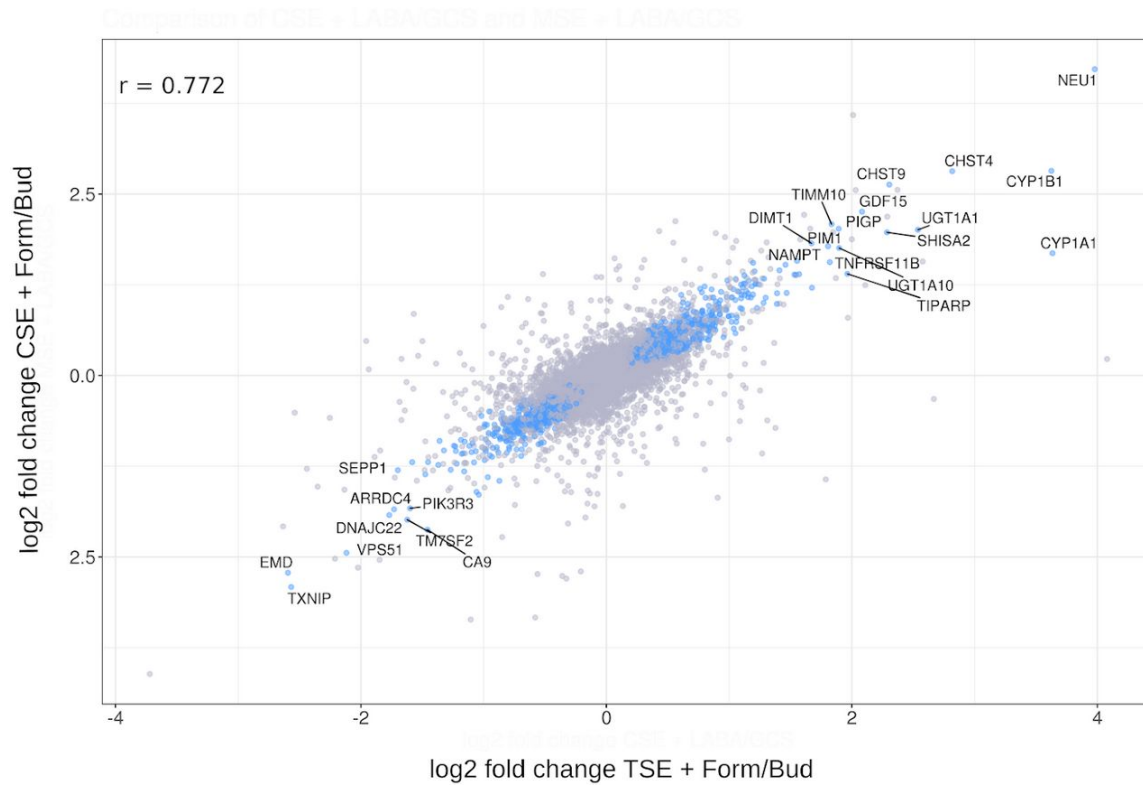

EXTRA SLIDES/ NOTES



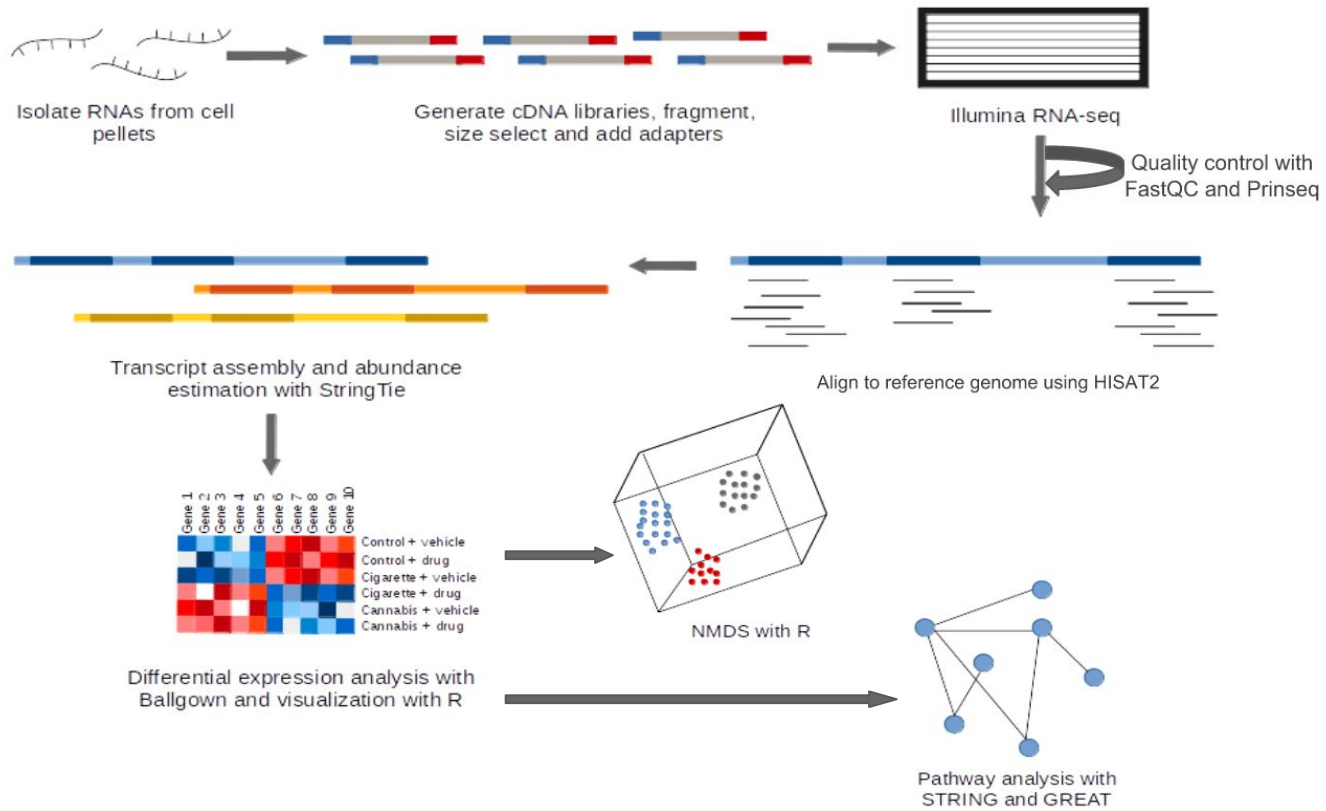

Figure 9 (Sketch)

CSE+MSE (up-regulated gene set)

Oxidative stress

"Cyclin E/CDK2 prevents oxidative stress-mediated Ras-induced senescence by phosphorylating MYC. Involved in G1-S phase DNA damage checkpoint that prevents cells with damaged DNA from initiating mitosis"

### Ontologies

GO Biological Process 2018

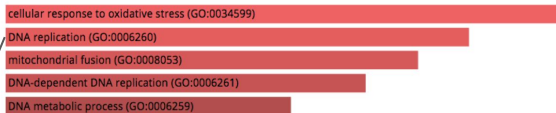

### Cell types

Human Gene Atlas

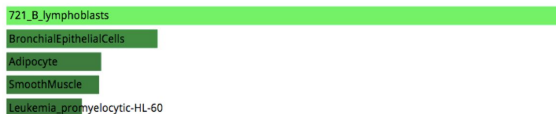

### Pathways

BioCarta 2016

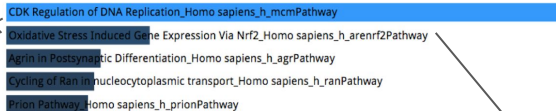

NCI-Nature 2016

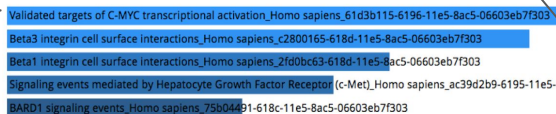

PPI Hub Proteins

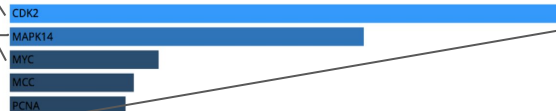

### Drug Response

RNA-Seq Disease Gene and Drug Signatures from GEO

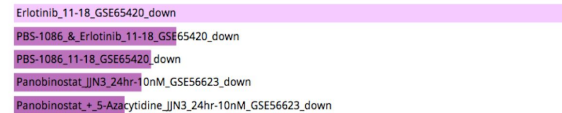

Drug Perturbations from GEO down

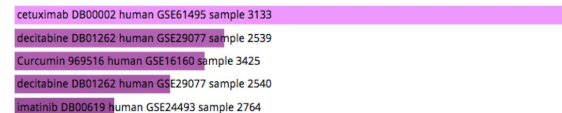

### Transcription

ChEA 2016

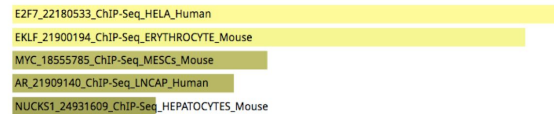

ENCODE and ChEA Consensus TFs from ChIP-X

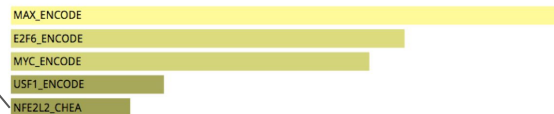

ENCODE TF ChIP-seq 2015

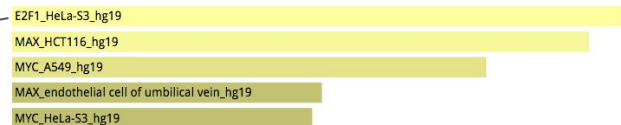

Cyclin E/CDK2 phosphorylates retinoblastoma protein (Rb) to promote G1 progression

Figure 10?

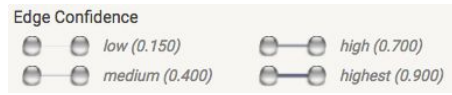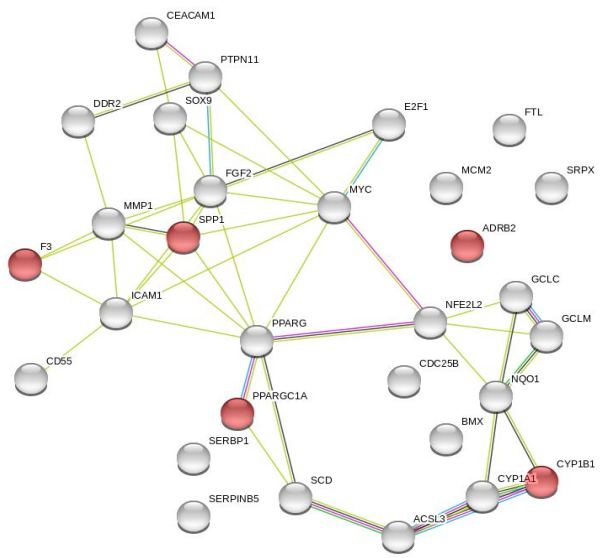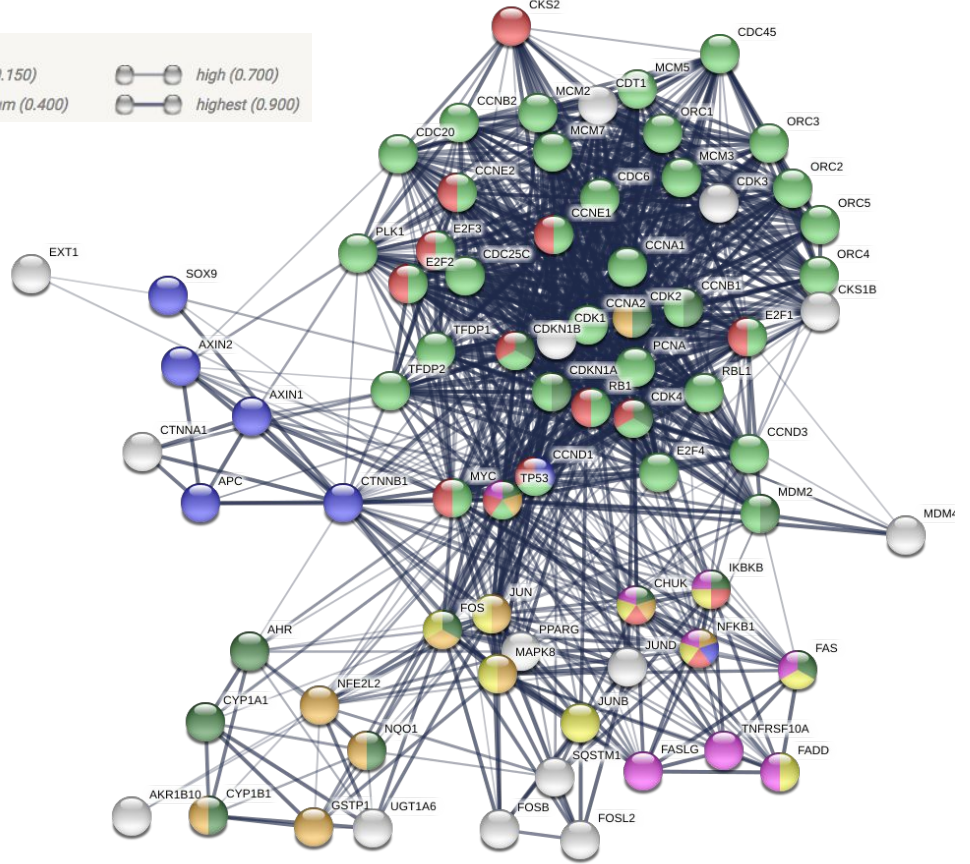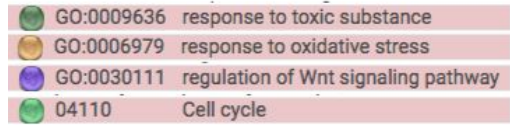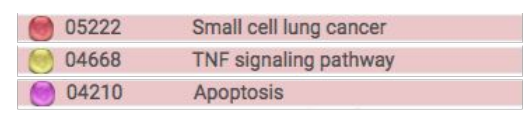

Supplement: Supplementary file [file media-12.pdf]
